# Supplementary material for: A Cloud Water Path-Based Model for Cloudy-Sky Downward Longwave Radiation Estimation from FY-4A Data
Source: MDPI journal article supplement (doi:10.3390/rs15235531), 2023-11-28
Supplement: s1 [file s1]

**Supplementary material:**

**Table S1.** Statistical values of SDLR errors at different PWV ranges, corresponding to Figure 10.

| PWV range (cm)                          |                 | (0, 1] | (1, 2] | (2,3] | (3, 4] | (4, 5] | (5, 6] | (6, 7] | (7, 8] |
|-----------------------------------------|-----------------|--------|--------|-------|--------|--------|--------|--------|--------|
| Sample                                  |                 | 97416  | 70883  | 39957 | 28336  | 19556  | 19151  | 6740   | 467    |
| RMSE (W/m <sup>2</sup> )                | Zhou2007        | 27.2   | 21.5   | 20.6  | 16.6   | 15.1   | 15.6   | 19.8   | 25.2   |
|                                         | Calibrated-zhou | 26.7   | 21.1   | 19.6  | 17.2   | 14.8   | 12.2   | 10.0   | 6.3    |
|                                         | New model       | 25.4   | 20.3   | 19.1  | 16.8   | 14.4   | 11.9   | 9.6    | 7.4    |
| MBE (W/m <sup>2</sup> )                 | Zhou2007        | 4.5    | 4.3    | 6.0   | -0.2   | -6.3   | -9.8   | -17.1  | -24.0  |
|                                         | Calibrated-zhou | -0.9   | -4.4   | -1.3  | -3.3   | -3.9   | -1.1   | -1.5   | -0.8   |
|                                         | New model       | 0.0    | 0.0    | -0.4  | -3.3   | -3.9   | -0.7   | 0.2    | 2.9    |
| First quartile (W/m <sup>2</sup> )      | Zhou2007        | -15.0  | -9.9   | -5.8  | -10.2  | -15.0  | -17.9  | -23.8  | -29.2  |
|                                         | Calibrated-zhou | -20.5  | -18.4  | -13.1 | -13.8  | -13.2  | -8.9   | -8.0   | -4.7   |
|                                         | New model       | -16.8  | -13.3  | -11.7 | -13.3  | -12.6  | -8.2   | -6.3   | -1.8   |
| Third quartile (W/m <sup>2</sup> )      | Zhou2007        | 24.4   | 17.8   | 17.2  | 9.5    | 2.5    | -1.8   | -10.8  | -19.3  |
|                                         | Calibrated-zhou | 19.1   | 8.7    | 9.8   | 6.7    | 5.5    | 7.2    | 5.0    | 3.1    |
|                                         | New model       | 18.3   | 12.6   | 10.4  | 6.4    | 5.3    | 7.3    | 6.5    | 7.5    |
| Median value (W/m <sup>2</sup> )        | Zhou2007        | 5.4    | 2.0    | 4.3   | -0.2   | -6.2   | -9.7   | -17.4  | -24.4  |
|                                         | Calibrated-zhou | 0.1    | -6.6   | -2.5  | -2.8   | -3.5   | -0.5   | -1.2   | -0.7   |
|                                         | New model       | 1.0    | -2.2   | -1.5  | -2.9   | -3.4   | -0.1   | 0.5    | 2.8    |
| Upper limit (W/m <sup>2</sup> )         | Zhou2007        | 83.6   | 59.2   | 51.7  | 39.1   | 28.8   | 22.2   | 8.7    | -4.5   |
|                                         | Calibrated-zhou | 78.4   | 49.4   | 44.3  | 37.5   | 33.6   | 31.4   | 24.4   | 14.7   |
|                                         | New model       | 71.0   | 51.3   | 43.7  | 36.0   | 32.2   | 30.5   | 25.7   | 21.4   |
| Lower limit (W/m <sup>2</sup> )         | Zhou2007        | -74.2  | -51.3  | -40.3 | -39.8  | -41.3  | -41.9  | -43.3  | -44.0  |
|                                         | Calibrated-zhou | -79.9  | -59.1  | -47.6 | -44.5  | -41.3  | -33.1  | -27.4  | -16.3  |
|                                         | New model       | -69.5  | -52.1  | -45.0 | -42.8  | -39.6  | -31.5  | -25.4  | -15.7  |
| Interquartile range (W/m <sup>2</sup> ) | Zhou2007        | 39.5   | 27.6   | 23.0  | 19.7   | 17.5   | 16.0   | 13.0   | 9.9    |
|                                         | Calibrated-zhou | 39.6   | 27.1   | 23.0  | 20.5   | 18.7   | 16.1   | 13.0   | 7.7    |
|                                         | New model       | 35.1   | 25.9   | 22.2  | 19.7   | 17.9   | 15.5   | 12.8   | 9.3    |

**Table S2.** Statistical values of SDLR errors at different LWP ranges for water and mixed phase clouds, corresponding to Figure 11a.

| LWP range (g/m <sup>2</sup> )           |                 | (0, 50] | (50, 100] | (100,150] | (150,200] | (200,250] | (250,300] | (300,350] | (350,400] | (400, 1000] |
|-----------------------------------------|-----------------|---------|-----------|-----------|-----------|-----------|-----------|-----------|-----------|-------------|
| sample                                  |                 | 11683   | 17452     | 10610     | 8141      | 4242      | 142055    | 1691      | 1312      | 5425        |
| RMSE (W/m <sup>2</sup> )                | Zhou2007        | 20.1    | 20.5      | 19.4      | 18.3      | 19.1      | 24.4      | 19.0      | 18.8      | 21.2        |
|                                         | Calibrated-zhou | 19.8    | 20.5      | 21.0      | 21.0      | 21.8      | 23.2      | 22.4      | 22.5      | 24.1        |
|                                         | New model       | 18.7    | 19.4      | 19.9      | 18.9      | 19.9      | 22.5      | 20.1      | 20.1      | 21.9        |
| MBE (W/m <sup>2</sup> )                 | Zhou2007        | 1.9     | 2.2       | -2.6      | -4.7      | -4.3      | 5.6       | -4.5      | -4.8      | -2.8        |
|                                         | Calibrated-zhou | -3.1    | -4.6      | -9.3      | -11.1     | -11.0     | -1.0      | -11.9     | -12.5     | -10.6       |
|                                         | New model       | -2.6    | -1.8      | -6.3      | -8.1      | -7.9      | 0.7       | -9.1      | -9.5      | -8.3        |
| First quartile (W/m <sup>2</sup> )      | Zhou2007        | -10.3   | -10.9     | -14.7     | -15.4     | -15.0     | -10.0     | -15.9     | -15.8     | -14.3       |
|                                         | Calibrated-zhou | -14.7   | -17.1     | -20.8     | -21.8     | -22.2     | -16.2     | -24.3     | -25.1     | -23.5       |
|                                         | New model       | -13.2   | -13.2     | -17.5     | -17.7     | -17.9     | -13.1     | -19.8     | -20.0     | -18.7       |
| Third quartile (W/m <sup>2</sup> )      | Zhou2007        | 14.6    | 15.5      | 8.6       | 4.6       | 4.8       | 21.6      | 5.1       | 4.0       | 6.5         |
|                                         | Calibrated-zhou | 9.2     | 8.2       | 1.7       | -1.5      | -1.2      | 14.3      | -1.1      | -2.3      | 0.3         |
|                                         | New model       | 9.2     | 10.7      | 4.5       | 1.2       | 1.2       | 15.3      | 0.2       | 0.0       | 1.5         |
| Median value (W/m <sup>2</sup> )        | Zhou2007        | 1.8     | 2.0       | -3.6      | -5.8      | -5.7      | 4.3       | -6.1      | -6.4      | -4.5        |
|                                         | Calibrated-zhou | -2.2    | -4.4      | -9.7      | -11.8     | -11.3     | -1.6      | -13.2     | -13.3     | -11.8       |
|                                         | New model       | -1.1    | -0.8      | -6.7      | -8.4      | -8.4      | 0.4       | -9.5      | -9.8      | -9.0        |
| Upper limit (W/m <sup>2</sup> )         | Zhou2007        | 52.1    | 55.2      | 43.5      | 34.5      | 34.6      | 69.0      | 36.7      | 33.7      | 37.7        |
|                                         | Calibrated-zhou | 45.1    | 46.3      | 35.4      | 29.0      | 30.2      | 59.9      | 33.8      | 31.9      | 36.2        |
|                                         | New model       | 42.9    | 46.5      | 37.5      | 29.5      | 29.7      | 57.9      | 30.4      | 29.9      | 31.9        |
| Lower limit (W/m <sup>2</sup> )         | Zhou2007        | -47.8   | -50.6     | -49.7     | -45.3     | -44.8     | -57.4     | -47.5     | -45.4     | -45.4       |
|                                         | Calibrated-zhou | -50.6   | -55.1     | -54.5     | -52.3     | -53.6     | -61.8     | -59.1     | -59.2     | -59.3       |
|                                         | New model       | -46.8   | -49.0     | -50.4     | -46.1     | -46.4     | -55.6     | -50.0     | -49.9     | -49.1       |
| Interquartile range (W/m <sup>2</sup> ) | Zhou2007        | 25.0    | 26.4      | 23.3      | 19.9      | 19.8      | 31.6      | 21.1      | 19.8      | 20.8        |
|                                         | Calibrated-zhou | 23.9    | 25.4      | 22.5      | 20.3      | 20.9      | 30.4      | 23.2      | 22.8      | 23.9        |
|                                         | New model       | 22.4    | 23.9      | 22.0      | 18.9      | 19.0      | 28.4      | 20.1      | 20.0      | 20.2        |

**Table S3.** Statistical values of SDLR errors at different IWP ranges for ice clouds, corresponding to Figure 11a.

| IWP range (g/m <sup>2</sup> )           |                 | (0, 100] | (100,200] | (200,300] | (300,400] | (400,500] | (500,600] | (600,700] | (700,1000] |
|-----------------------------------------|-----------------|----------|-----------|-----------|-----------|-----------|-----------|-----------|------------|
| Sample                                  |                 | 56216    | 5096      | 3332      | 2236      | 1882      | 1471      | 1263      | 3532       |
| RMSE (W/m <sup>2</sup> )                | Zhou2007        | 20.2     | 19.2      | 20.6      | 20.2      | 19.9      | 18.7      | 20.4      | 19.5       |
|                                         | Calibrated-zhou | 18.8     | 18.7      | 20.4      | 19.5      | 18.7      | 17.8      | 18.9      | 17.7       |
|                                         | New model       | 18.5     | 18.2      | 18.7      | 17.7      | 15.9      | 14.7      | 15.5      | 13.8       |
| MBE (W/m <sup>2</sup> )                 | Zhou2007        | -0.2     | -3.5      | -8.1      | -8.6      | -10.4     | -10.1     | -11.9     | -11.9      |
|                                         | Calibrated-zhou | 1.6      | -3.8      | -7.5      | -7.0      | -8.0      | -7.4      | -8.3      | -7.8       |
|                                         | New model       | 0.9      | -2.3      | -3.8      | -1.9      | -2.5      | -1.5      | -1.8      | -1.3       |
| First quartile (W/m <sup>2</sup> )      | Zhou2007        | -14.0    | -16.0     | -19.8     | -20.3     | -21.4     | -19.8     | -21.4     | -20.9      |
|                                         | Calibrated-zhou | -10.5    | -15.2     | -18.4     | -17.8     | -18.3     | -17.5     | -18.1     | -17.2      |
|                                         | New model       | -11.0    | -13.4     | -14.5     | -12.3     | -11.6     | -10.3     | -10.7     | -8.7       |
| Third quartile (W/m <sup>2</sup> )      | Zhou2007        | 12.8     | 8.8       | 3.3       | 1.8       | 0.1       | -0.8      | -2.9      | -2.9       |
|                                         | Calibrated-zhou | 13.1     | 8.1       | 4.1       | 3.8       | 2.7       | 2.9       | 2.3       | 2.5        |
|                                         | New model       | 11.9     | 8.5       | 6.7       | 7.1       | 6.3       | 6.9       | 6.6       | 6.3        |
| Median value (W/m <sup>2</sup> )        | Zhou2007        | -2.0     | -3.7      | -8.4      | -9.5      | -10.7     | -10.3     | -12.3     | -11.5      |
|                                         | Calibrated-zhou | 1.5      | -3.6      | -6.6      | -7.0      | -7.5      | -6.6      | -6.7      | -6.2       |
|                                         | New model       | -0.2     | -2.2      | -3.5      | -3.2      | -3.2      | -1.8      | -1.8      | -1.2       |
| Upper limit (W/m <sup>2</sup> )         | Zhou2007        | 53.1     | 46.0      | 38.0      | 34.9      | 32.2      | 27.7      | 24.9      | 24.2       |
|                                         | Calibrated-zhou | 48.5     | 43.0      | 37.8      | 36.2      | 34.2      | 33.4      | 32.7      | 32.1       |
|                                         | New model       | 46.2     | 41.4      | 38.6      | 36.1      | 33.1      | 32.7      | 32.5      | 28.8       |
| Lower limit (W/m <sup>2</sup> )         | Zhou2007        | -54.3    | -53.1     | -54.5     | -53.4     | -53.5     | -48.4     | -49.2     | -48.0      |
|                                         | Calibrated-zhou | -46.0    | -50.1     | -52.1     | -50.2     | -49.7     | -48.0     | -48.6     | -46.7      |
|                                         | New model       | -45.3    | -46.3     | -46.3     | -41.4     | -38.3     | -36.1     | -36.6     | -31.3      |
| Interquartile range (W/m <sup>2</sup> ) | Zhou2007        | 26.9     | 24.8      | 23.1      | 22.1      | 21.4      | 19.0      | 18.5      | 18.1       |
|                                         | Calibrated-zhou | 23.6     | 23.3      | 22.5      | 21.6      | 21.0      | 20.4      | 20.3      | 19.7       |
|                                         | New model       | 22.9     | 21.9      | 21.2      | 19.4      | 17.9      | 17.2      | 17.3      | 15.0       |
